1  
2  
3  
4  
5  
6  
7  
8  
9  
10  
11  
12  
13  
14  
15  
16  
17  
18  
19  
20  
21  
22

## TITLE PAGE

**Title: Combining single- and repeated-visit occupancy models to make the best of monitoring surveys**

### **Authors**

**Valentin Lauret<sup>1</sup>, H el ene Labach<sup>1,2</sup>, Matthieu Authier<sup>3,4</sup>, Olivier Gimenez<sup>1</sup>**

(1) CEFE, CNRS, Universit e Montpellier, Universit e Paul Val ery Montpellier 3, EPHE, IRD, 1919 route de Mende 34090 Montpellier, France

(2) GIS3M, Groupement d'Int er et Scientifique pour les Mammif eres marins de M editerran ee, 1 avenue Cl ement Monnier 13960 Sausset-les-Pins, France

(3) ADERA, 162 avenue Albert Schweitzer, 33608 Pessac Cedex

(4) Observatoire PELAGIS, UMS 3462 CNRS-La Rochelle Universit e, 5 all ee de l'Oc ean, 17000 La Rochelle

**Corresponding author:** Valentin Lauret, [valentin.lauret@cefe.cnrs.fr](mailto:valentin.lauret@cefe.cnrs.fr), CEFE 1919 Route de Mende, 34090 Montpellier, France.

23

24 **Abstract**

25 1. A major challenge in applied ecology consists in integrating knowledge from  
26 different datasets to produce robust ecological indicators. To estimate species distribution,  
27 occupancy models are a flexible framework that can accommodate several datasets obtained  
28 from different sampling methods. However, repeating visits at sampling sites is a prerequisite  
29 for using standard occupancy models, which may limit their use. Under certain conditions,  
30 detection/non-detection data collected during single visit can be analysed with occupancy  
31 models. To date however, single-visit occupancy models have never been used to combine  
32 several different datasets.

33 2. Here, we developed an approach that combines multi-method and single-visit  
34 occupancy models. As a case study, we estimated the distribution of Bottlenose dolphins  
35 (*Tursiops truncatus*) over the North-western Mediterranean Sea by combining 24,624 km of  
36 aerial surveys and 21,464 km of at-sea monitoring. We compared the outputs of single- vs.  
37 repeated-visit multi-method occupancy models, and that of single-method occupancy models.

38 3. Multi-method models allowed a better sampling coverage in both coasts and high  
39 seas and provided a better precision for occupancy estimates than single-method occupancy  
40 models using aerial surveys or at-sea surveys in isolation.

41 4. Overall, single- and repeated-visit multi-method occupancy models produced  
42 similar inference about the distribution of bottlenose dolphins. This suggests that single-visit  
43 occupancy models provide robust occupancy estimates, which open promising perspectives  
44 for the use of non-standardized datasets.

45 5. *Synthesis and applications:* Single-visit multi-method occupancy models can help  
46 making the best out of ecological monitoring programs by optimizing cost effectiveness  
47 through the formal combination of datasets.

48

49 **Keywords**

50 *Bottlenose dolphins, Ecological monitoring, Integrated species distribution models, Multi-*  
51 *method, Occupancy models, Single-visit*

52

53 **Introduction**

54 Ecological monitoring (EM) is an inherent process of most ecology and conservation  
55 biology studies. EM produces important information for decision-making prior implementing  
56 management strategies, or for evaluating management efficiency (Lyons, Runge, Laskowski,  
57 & Kendall, 2008). With the proliferation of EM programs, concerns have been raised about  
58 the quality of sampling design (Bernhardt et al., 2005; J. Nichols & Williams, 2006; Yoccoz,  
59 Nichols, & Boulinier, 2001), and the sub-optimal use of collected data to inform wildlife  
60 management (Lindenmayer & Likens, 2010; J. Nichols & Williams, 2006). Some criticisms  
61 pointed out EM programs as being costly and wasteful, with few informative outcomes from  
62 collected data (Lovett et al., 2007), while studies in ecology and conservation are often  
63 performed in cost-constrained contexts that require making the best out of EM programs  
64 (Lindenmayer & Likens, 2010).

65 In applied ecology, several competing EM programs are often carried out to collect  
66 ecological data. EM programs are conducted by organizations operating across different time  
67 scales, geographic scales and funding initiatives (Lindenmayer & Likens, 2010). Some EM  
68 programs are performed at the local level, and provide highly detailed information over small  
69 spatial extents. On the other hand, institutional agenda of high-level policy-makers argue for  
70 large scale evaluation of environmental status (e.g. the EU Marine Strategy Framework  
71 Directive that requires a global assessment of European marine waters *Directive 2008/56/EC*  
72 *of the European Parliament*). Ideally, effective EM should address well-defined objectives  
73 using standardized sampling design, i.e. fixed protocols at known sampling locations (Lovett

74 et al., 2007). However, in many cases, EM collect data under protocols in which the sampling  
75 locations, effort and methods are meant to change over time, therefore leading to what we will  
76 refer to as *non-standardized* data (Miller, Pacifici, Sanderlin, & Reich, 2019).

77 In this context, a major challenge consists in integrating knowledge from different EM  
78 programs (Fletcher et al., 2019; Lindenmayer & Likens, 2010; Miller et al., 2019) to produce  
79 robust ecological indicators that may be used to inform decision-making. Among others,  
80 species distribution is often required in ecology and conservation biology (Cabeza et al.,  
81 2004; Dorazio, 2014; Guillera-Aroita, Ridout, & Morgan, 2010). To this purpose, the IUCN  
82 introduced the Area Of Occupancy (AOO) as one of the main indicator of species  
83 distribution, defined as the area of suitable habitat occupied by the taxon (IUCN Standards  
84 and Petitions Subcommittee 2014). Recently, modelling tools have emerged to combine  
85 multiple data sources to estimate species distributions (Fletcher et al., 2019; Miller et al.,  
86 2019; J. D. Nichols et al., 2008). *Multi-method models* refer to the modelling approaches that  
87 combine different data sources (also known as *integrated species distribution models*, Miller  
88 et al. 2019). The main purpose of multi-method models is to improve the accuracy of  
89 ecological indicators (Bonnet-Lebrun, Calabrese, Rocamora, & López-Sepulcre, 2016;  
90 Jiménez et al., 2016). Species distributed over large scale areas could particularly benefit from  
91 multi-method models because they allow a global coverage of species occurrence by  
92 combining different data sources collected at different spatial scales (Haynes, Rosenberger,  
93 Lindberg, Whitman, & Schmutz, 2013; Miller et al., 2019).

94 In addition to the challenge of combining several sources of information, EM faces  
95 uncertainties inherent to data collection. When monitoring elusive or mobile species,  
96 individuals can be missed even if present at the sampling site. The so-called imperfect  
97 detection issue (i.e. false-negative observations) leads to the underestimation of species  
98 distribution if not accounted for (Mackenzie et al., 2002). To deal with imperfect detection,

99 occupancy models have been developed to estimate species distribution while accounting for  
100 false negatives in the observation process (Mackenzie et al., 2002). Estimating occupancy  
101 when species detection is less than 1 requires performing *repeated visits* (hereafter *RV*) to  
102 estimate the probability of detection (MacKenzie, 2006; Mackenzie et al., 2002). However,  
103 *RV* come with costs and logistical issues that make them not always feasible. There is a trade-  
104 off between i) investing in a reasonable sampling effort to perform *RV*, and ii) conducting  
105 monitoring at large scales without repeating visits at sample sites (Dénes, Sólymos, Lele,  
106 Silveira, & Beissinger, 2017).

107 In this context, two relevant developments of occupancy models have been recently  
108 proposed. First, multi-method occupancy models combine data from different monitoring  
109 programs to improve the estimation of species distribution (Fletcher et al., 2019; Miller et al.,  
110 2019; Nicol et al., 2019). Second, *single-visit* (*SV*) occupancy models allow estimating  
111 species distribution and detectability while having only one visit at the sampling site (Lele,  
112 Moreno, & Bayne, 2012; Miller et al., 2019). Therefore, we expect *SV* occupancy models to  
113 overcome some limitations that arise when using non-standardized data (e.g. lack of repeated  
114 surveys in occupancy modelling, Miller et al. 2019), hence being beneficial to cost-  
115 constrained EM programs (Dénes et al., 2017; Lele et al., 2012). Besides, *RV* occupancy  
116 models require that the ecological state of sampled sites remains unchanged between visits,  
117 which is not always the case, while *SV* models allow to relax this so-called closure  
118 assumption (Lele et al., 2012). An increasing number of studies suggest that under certain  
119 conditions, *SV* models produce robust estimates of occupancy without repeating visits at the  
120 sampling sites (Laran, Authier, et al., 2017; Lele et al., 2012; Peach, Cohen, & Frair, 2017;  
121 Sólymos & Lele, 2016).

122 In this paper, we develop an approach that combines multi-method and single-visit  
123 occupancy models. As a case study, we focus our analysis on the distribution of Bottlenose

124 dolphins (*Tursiops truncatus*) in the North-Western Mediterranean Sea. We illustrate how  
125 two datasets of marine monitoring programs can be combined with multi-method SV  
126 occupancy models to estimate AOO indicator for biodiversity conservation. In the marine  
127 world, many species of conservation interest are elusive, and EM data can be costly  
128 (Aylesworth, Loh, Rongrongmuang, & Vincent, 2017; Read "Marine Protected Areas, 2001).  
129 In particular, the high seas are difficult to access and EM is often performed through aerial  
130 surveys (Authier et al., 2017). Coasts are another challenge that require detailed attention, and  
131 proximity to land allows to perform at-sea monitoring (Issaris et al., 2012; Pennino, Mérigot,  
132 Fonseca, Monni, & Rotta, 2017). Besides, many species such as marine megafauna are  
133 mobile and occur in both coasts and high seas (Authier et al., 2017; Laran, Pettex, et al.,  
134 2017). Combining monitoring programs that are carried out in each realm (i.e. coasts and high  
135 seas) has the potential to provide relevant information about these species (Waggitt et al.,  
136 2019). Here, we combine aerial surveys and at-sea monitoring into multi-method SV  
137 occupancy models. We compare the outputs of multi-method occupancy models to occupancy  
138 models using at-sea monitoring data only or aerial survey data only. We demonstrate that  
139 combining several datasets into multi-method SV occupancy models leads to accurate  
140 ecological estimation while relaxing the assumptions hampering the accommodation of non-  
141 standardized data. Last, we discuss the advantages of using complementary EM programs in  
142 applied ecology.

143

## 144 **Methods**

### 145 **1. Study species and area**

146 The North-Western Mediterranean waters represent an important biodiversity hotspot  
147 coexisting with intense human activities (Fraschetti, Terlizzi, Micheli, Benedetti-Cecchi, &  
148 Boero, 2002; Giakoumi et al., 2017; Lloret & Riera, 2008; Moullec et al., 2019).

149 Anthropogenic pressures and climatic vulnerability underline the critical position of  
150 Mediterranean Sea for biodiversity conservation (Giakoumi et al., 2017). We focused on the  
151 North-Western Mediterranean, an area of 255,000 km<sup>2</sup>, which includes the Gulf of Lion and  
152 the Ligurian sea, the French coast, Corsica, and the Northern part of Sardinia (Fig. 1). For  
153 statistical analyses, we divided the study area in 5346 pixel/sites creating a 5'x5' Madsen  
154 grid (WGS 84).

155 The North-Western Mediterranean Sea is a critical habitat for many cetaceans species  
156 (Bearzi, Piwetz, & Reeves, 2019; Labach et al., 2019; Laran, Pettex, et al., 2017). Due to its  
157 coastal behaviour, bottlenose dolphins (*Tursiops truncatus*) suffer from several threats due to  
158 anthropic pressures (e.g. collisions, fisheries bycatch, pollution, or acoustic perturbations),  
159 which raise concerns about their coexistence with human activities (Bearzi, Fortuna, &  
160 Reeves, 2009; Bearzi et al., 2019; Laran, Pettex, et al., 2017). Mediterranean population of  
161 Bottlenose dolphins is considered “vulnerable” by the IUCN Red List (IUCN, 2009) and is  
162 one of the two cetacean species listed on the Annex 2 in the European Habitats Directive  
163 (92/43/EEC). The protected status of this species within the French seas led to development  
164 of specific monitoring programs for its study in the Mediterranean Sea within the  
165 implementation of the European Marine Strategy Framework Directive (2008/56/EC; MSFD).  
166

## 167 **2. Data collection**

168 We considered two large-scale monitoring programs developed for bottlenose  
169 dolphins in the North-Western Mediterranean Sea.

### 170 **At-sea coastal monitoring program**

171 We used data from the first large-scale study of Bottlenose dolphins in the French  
172 Mediterranean Sea. Four NGOs and one marine reserve performed at-sea surveys over 21,464  
173 km of the French continental shelf including the Gulf of Lion, the French Riviera, and

174 Corsica. This program was performed all year long between 2013 and 2015 (see Labach et al.  
175 2019 for details about the program).

### 176 **Aerial pelagic and coastal monitoring program**

177 Data were collected during aerial surveys targeting the main taxa of marine megafauna  
178 within the French Exclusive Economic Zone (EEZ) including the Pelagos Sanctuary. The  
179 survey covered 24,624 km of line-transect performed by scientific institutional partners of the  
180 French Biodiversity Agency between November 2011 and August 2012. This survey is  
181 repeated every six years to inform the MSFD.

### 182 **Environmental data**

183 We used two environmental covariates to estimate the area of occupancy of bottlenose  
184 dolphins: i) bathymetry, which is expected to have a negative effect on bottlenose dolphins'  
185 occurrence (Bearzi et al., 2009; Labach et al., 2019), and ii) sea surface temperature (SST,  
186 from Aqua/MODIS | NASA" 2019), which is locally related to dolphins' prey abundance and  
187 hence expected to affect local distribution of bottlenose dolphins (Bearzi et al., 2009;  
188 Giannoulaki et al., 2013; Passadore, Möller, Diaz-Aguirre, & Parra, 2018; Queiros,  
189 Fromentin, Astruc, Bauer, & Saraux, 2018). We checked for correlation between the two  
190 covariates and the Pearson coefficient was  $< 0.3$ .

191

### 192 **3. Occupancy models**

193 Occupancy models estimate spatial distribution while accounting for imperfect species  
194 detection (Mackenzie et al., 2002). In EM, a species may be not detected on a site even  
195 though it was present at that site – this is usually referred to as false negatives. The  
196 formulation of occupancy models as state-space models (SSM) allows distinguishing the  
197 latent ecological state process (i.e. species present or absent at a site) from the detection  
198 process (Royle & Kéry, 2007). We denote  $z_i$  the latent occupancy of site  $i$  ( $z = 1$ , presence;  $z$



199 = 0, absence). We assumed  $z_i$  is drawn from a Bernoulli distribution with  $\Psi_i$  the probability  
200 that the species is present at site  $i$ .

$$201 \quad z_i \sim \text{Bernoulli}(\Psi_i).$$

202 In standard occupancy designs, each site is visited  $J$  times to estimate the rate of false-  
203 negatives. We denote  $y_{i,j}$  ( $y_{i,j} = 0$ , no detection;  $y_{i,j} = 1$ , detection) the observations  
204 corresponding to the data collected at site  $i$  during visit  $j$  ( $j = 1, \dots, J$ ). Repeating visits at a site  
205 allows estimating species detectability, with  $p_{i,j}$  being the probability of detecting the species  
206 at visit  $j$  given it is present at site  $i$ .

$$207 \quad y_{i,j} | z_i \sim \text{Bernoulli}(z_i \cdot p_{i,j})$$

208 An important assumption of occupancy models is that the latent ecological state of a  
209 site (the  $z_i$ 's) remains unchanged between the repeated visits (MacKenzie, 2006). When  
210 monitoring highly mobile species, such as cetaceans, the closure assumption is likely to be  
211 violated because individuals moved into and out of the sampling sites. Occupied locations are  
212 used only temporary by individuals (MacKenzie 2006; Neilson et al. 2018). Then, occupancy  
213 is interpreted as the proportion of sampled sites *used* by the species, and AOO represents the  
214 *area of use* by the species. Subsequently, the occupancy estimator  $\Psi_i$  represents the  
215 probability that site  $i$  is *used* by the target species as opposed to the probability of occupancy  
216 (Kendall, Hines, Nichols, & Grant, 2013). The detection probability now accounts for both  
217 the probability of detecting the species and the probability that the species is present in the  
218 sampling unit, reflecting that the species might occupy the site but not during the sampling  
219 occasion (MacKenzie, 2006). [MacKenzie \(2006\)](#) showed that if individuals' movement in and  
220 out of the sampling sites is random, then the occupancy estimator is unbiased (Kendall et al.,  
221 2013).

222 We considered four sampling occasions ( $J = 4$ ): winter (January, February, March),  
223 spring (Avril, May, June), summer (July, August, September), autumn (October, November,

224 December). To estimate the sampling effort of the two monitoring programs, we calculated  
225 the transect length (in km) prospected by the monitoring method within each site at each  
226 occasion. Each sampling occasion  $j$  depicted a similar amount of sampling effort over the  
227 studied area.

228 We modelled  $\Psi$  as a function of the environmental covariates bathymetry and SST on  
229 a logit scale, and  $p$  as a function of sampling effort on the logit scale:

$$230 \quad \text{Logit}(\Psi_i) = \beta_0 + \beta_1 * \text{bathymetry}_i + \beta_2 * \text{SST}_i,$$

$$231 \quad \text{Logit}(p_{i,j}) = \alpha_0 + \alpha_1 * \text{sampling\_effort}_{i,j}$$

232 where regression parameters  $\beta_0$ ,  $\beta_1$ ,  $\beta_2$ ,  $\alpha_0$ , and  $\alpha_1$  are unknown and need to be estimated.

233 We considered that a covariate effect size was statistically significant when its 95%  
234 credible interval (CI) did not include 0.

235

#### 236 **4. Multi-method occupancy models**

237

238 Although most occupancy studies use a single method to collect detection/non-  
239 detection data, it is possible to consider several detection methods (Miller et al., 2019; J. D.  
240 Nichols et al., 2008). Multi-method occupancy models account for several detection  
241 probabilities, therefore allowing to quantify the detection error of each sampling method  
242 (Clare, McKinney, DePue, & Loftin, 2017; Fisher & Bradbury, 2014; Pregler, Vokoun,  
243 Jensen, & Hagstrom, 2015). The Nichols et al (2008) multi-method approach considers two  
244 occupancy parameters to account for the different spatial scale of each detection methods.  
245 Bonnet-Lebrun et al., (2016) extended the multi-method framework for estimating multi-  
246 species abundance.

247 Here, we built a multi-method occupancy model using data from the two monitoring  
248 programs. For convenience, we drop the subscripts in the notation. The observation process

249 takes four values with  $y = 0$  for no detection,  $y = 1$  for detection by aerial survey only,  $y = 2$   
250 for detection by at-sea survey, and  $y = 3$  for detection by both monitoring programs.  
251 Assuming the detection methods are independent, the observation process can be written  
252 using detection probability by the aerial survey ( $p_a$ ) and the detection probability by the at-sea  
253 survey ( $p_s$ ):

$$y|z \sim \text{Multinomial}(1, z * \pi)$$

254 with

$$\pi = [p_0 \quad p_1 \quad p_2 \quad p_3] = [\text{pr}(y = 0) \quad \text{pr}(y = 1) \quad \text{pr}(y = 2) \quad \text{pr}(y = 3)]$$

$$\pi = [1 - p_a - p_s + p_a p_s \quad p_a(1 - p_s) \quad p_s(1 - p_a) \quad p_a p_s]$$

## 255 **5. Single-visit occupancy models**

256 SV occupancy requires that the set of covariates affecting occupancy includes at least  
257 one different covariate from the one affecting detection probability (Dénes et al., 2017; Lele  
258 et al., 2012; Sólymos & Lele, 2016). We applied SV occupancy models to both aerial surveys  
259 and at-sea dataset. As we considered a single visit ( $J = 1$ ), we calculated the total sampling  
260 effort and averaged the SST values over the 4 repeated visits.

## 261 **6. Bayesian implementation**

262 To assess the performance of multi-method SV occupancy models, we analysed  
263 separately aerial survey data models and at-sea data using both SV and RV occupancy  
264 models. We ran all models with three chains of Markov Chain Monte Carlo sampler with  
265 20,000 iteration each in JAGS (Plummer & others, 2003) called from R (R Core Team, v  
266 3.2.5 2019) using the *r2jags* package (Su & Yajima, 2015). We checked for convergence  
267 calculating the *R-hat* parameter (Gelman et al., 2013) and reported posterior means and 95%  
268 credible intervals (CI) for all parameters.

## 269 **Results**

270 Between summer 2013 and summer 2015, at-sea surveys produced 1,670 dolphins'  
271 detections located in 89 sites. The sampling effort of at-sea surveys was heterogeneous over

272 the study area (between 1 and more than 20 visits per site, Fig. 1). Sampling effort for aerial  
273 surveys was homogeneous over the studied area with three or four replicates per line-transect  
274 between November 2011 and August 2012. The aerial survey produced 170 detections located  
275 in 87 sites.

276 Multi-method occupancy models had a better precision than aerial survey or at-sea  
277 occupancy models to estimate effect size of environmental covariates on  $\Psi$  (see 95% CI in  
278 Fig. 2). Aerial survey had a better precision than at-sea survey. SV occupancy models  
279 produced similar estimates to RV occupancy models although with lower precision to  
280 estimate the effect size of bathymetry and SST on  $\Psi$  (Fig. 2). Estimates of SST and  
281 bathymetry effects were similar between all occupancy models. Parameter  $\Psi$  increased when  
282 bathymetry decreased. Bathymetry ranges from 0 m to 3,488 m deep, hence a negative  
283 influence of the bathymetry referred to a preference for a low seafloor (e.g. 0-200m depth).  
284 SST effect size was null for all models (Fig. 2).

285 All maps displayed higher  $\Psi$  values on the continental shelf than on the high seas  
286 although intensities of  $\Psi$  were different between occupancy models (Fig. 3). At-sea surveys  
287 produced the most contrasted maps, with the highest estimation of  $\Psi$  in the high-seas and the  
288 lowest in the continental shelf. Maps from multi-method occupancy models displayed  
289 moderate contrast of  $\Psi$  compared to maps from at-sea and from aerial surveys (Fig. 3). SV  
290 models displayed higher  $\Psi$  in sea shelf compared to RV occupancy models.

291

## 292 **Discussion**

### 293 **Combining datasets improves parameter estimates of occupancy models**

294 When the species of interest displays a large range of occurrence (such as bottlenose  
295 dolphins), considering multiple sampling methods is effective to monitor the entire population  
296 making the best of each device (Haynes et al., 2013). In the marine world, aerial surveys

297 allow to monitor the pelagic area while at-sea surveys provided coastal information with a  
298 higher concentration of sampling effort, which results in maximizing spatial and temporal  
299 coverage of marine megafauna (Waggitt et al., 2019). In our case study, ecological estimates  
300 from multi-method occupancy models ranged between the estimates obtained with each  
301 dataset separately, and combining data increased precision of covariates effect size on AOO  
302 (i.e.  $\Psi$ , Fig. 2).

303         Across all occupancy models, the effects of environmental covariates were similar and  
304 consistent with other studies. Bottlenose dolphins are more likely to use low depth seafloor  
305 (Bearzi et al., 2009; Labach et al., 2019), and depth had a higher effect than SST on the use of  
306 space by bottlenose dolphins (Derville, Torres, Iovan, & Garrigue, 2018; Torres, Read, &  
307 Halpin, 2008). However, the probability of area used by bottlenose dolphins was spatially  
308 different between models (Fig. 3). Because at-sea occupancy model assigned more  
309 importance to bathymetry than aerial survey occupancy models, at-sea data occupancy models  
310 predicted a lower presence of bottlenose dolphins in the high seas than aerial surveys  
311 occupancy models (Figs 2-3). These spatial differences in the intensity of AOO could affect  
312 the allocation of conservation funding for future monitoring or management of this species.  
313 For example, assuming the species makes little use of the high seas compared to the  
314 continental shelf might lead to unbalanced conservation effort discarding the high seas. Multi-  
315 method occupancy models accounted for bottlenose dolphins' detections from aerial surveys  
316 in the high seas and produced a map closer to aerial survey occupancy models than that of at-  
317 sea occupancy models. Our results support the well-known benefit of combining datasets into  
318 multi-method occupancy models (Clare et al., 2017; Haynes et al., 2013; Miller et al., 2019).  
319 The flexibility of occupancy models provided a relevant framework to combine monitoring  
320 programs (Miller et al., 2019; J. D. Nichols et al., 2008). Also, if detection methods are not  
321 independent, bias in parameter estimates may occur. Then, explicitly accounting for

322 dependence can overcome this issue (Clare et al., 2017; J. D. Nichols et al., 2008). Because  
323 at-sea and aerial surveys were performed during different years (see Methods section), we  
324 considered them as independent in our case study.

### 325 **Using SV occupancy models to make the best of EM**

326 Here, RV multi-method occupancy model provided the highest precision in effect size  
327 estimation of AOO, but implementing multiple methods combined with RV also led to the  
328 highest sampling effort. Monitoring agencies do not always have the resources to conduct RV  
329 and to implement multiple sampling methods (Pregler et al., 2015). In applied ecology,  
330 monitoring is often performed in a cost constrained context (Lindenmayer & Likens, 2010; J.  
331 D. Nichols et al., 2008). SV occupancy models produced similar estimates to those obtained  
332 with RV occupancy but with lower precision on the covariates' effect size (Fig. 2). Because  
333 at-sea sampling effort was heterogeneous among sampled sites, many sites were sampled only  
334 once by at-sea monitoring program. We underlined the capacity of SV occupancy models to  
335 use datasets obtained from sampling protocols that did not perform replicated surveys, which  
336 was the case for the at-sea dataset. In this way, Miller et al. (2019) encouraged further  
337 developments of methods mixing standardized and non-standardized frameworks. In this  
338 spirit, we illustrate the flexibility of the state-space modelling framework by building a multi-  
339 method occupancy model mixing RV occupancy for aerial surveys and SV occupancy for at-  
340 sea surveys (see Appendix I for details).

341 Although RV occupancy models remain statistically more efficient (Lele et al. 2012, Fig. 2),  
342 there are benefits in using SV to relax the closure assumption inherent in the ecological  
343 behaviour of mobile species like bottlenose dolphins (Kendall et al., 2013; Lele et al., 2012).  
344 Overall, when financial or logistical costs are an issue, SV occupancy models provide robust  
345 estimates while accounting for imperfect detection (Lele et al., 2012). Multi-method SV  
346 sampling design combines the benefit of a large spatial coverage due to the integration of

347 several datasets with a reduced cost associated to SV. As EM often suffers from a lack of  
348 well-articulated design (Lovett et al., 2007), multi-method SV occupancy modelling opens  
349 perspectives for the use of non-standardized data collected through different sampling  
350 designs.

351

## 352 **Implications for EM programs**

353

354 We acknowledge the importance of planning monitoring programs according to  
355 clearly stated objectives (Lindenmayer & Likens, 2010; J. Nichols & Williams, 2006). We  
356 showed that even with non-standardized datasets, using information from different monitoring  
357 programs is beneficial. Multi-method occupancy modelling has been used to evaluate EM  
358 programs prior to their implementation (i.e. comparing detection probabilities between  
359 devices, Otto & Roloff 2011; Haynes et al. 2013). In contrast, we emphasized the benefit of  
360 considering multiple methods after data collection. Even if at-sea dataset was not designed for  
361 occupancy modelling because of the lack of RV, its use into multi-method SV occupancy  
362 models improved precision in ecological estimates compared to analyses of aerial surveys  
363 only. Despite their crucial role in the conservation process, EM programs are often perceived  
364 as costly and wasteful when compared to management (Lovett et al., 2007). Maximizing their  
365 ecological outcomes through data combination and SV approaches will be beneficial for the  
366 support and cost effectiveness of EM program.

367

368

## 369 **References**

370 Authier, M., Commanducci, F. D., Genov, T., Holcer, D., Ridoux, V., Salivas, M., ... Spitz, J.

371 (2017). Cetacean conservation in the Mediterranean and Black Seas: Fostering

- 372 transboundary collaboration through the European Marine Strategy Framework  
373 Directive. *Marine Policy*, 82, 98–103. doi: 10.1016/j.marpol.2017.05.012
- 374 Aylesworth, L., Loh, T.-L., Rongrongmuang, W., & Vincent, A. C. J. (2017). Seahorses (  
375 *Hippocampus* spp.) as a case study for locating cryptic and data-poor marine fishes for  
376 conservation. *Animal Conservation*, 20(5), 444–454. doi: 10.1111/acv.12332
- 377 Bearzi, G., Fortuna, C. M., & Reeves, R. R. (2009). Ecology and conservation of common  
378 bottlenose dolphins *Tursiops truncatus* in the Mediterranean Sea. *Mammal Review*,  
379 39(2), 92–123. doi: 10.1111/j.1365-2907.2008.00133.x
- 380 Bearzi, G., Piwetz, S., & Reeves, R. R. (2019). Odontocete Adaptations to Human Impact and  
381 Vice Versa. In B. Würsig (Ed.), *Ethology and Behavioral Ecology of Odontocetes* (pp.  
382 211–235). doi: 10.1007/978-3-030-16663-2\_10
- 383 Bernhardt, E. S., Palmer, M. A., Allan, J. D., Alexander, G., Barnas, K., Brooks, S., ...  
384 Sudduth, E. (2005). Synthesizing U.S. River Restoration Efforts. *Science*, 308(5722),  
385 636–637. doi: 10.1126/science.1109769
- 386 Bonnet-Lebrun, A.-S., Calabrese, L., Rocamora, G., & López-Sepulcre, A. (2016). Estimating  
387 the abundance of burrow-nesting species through the statistical analysis of combined  
388 playback and visual surveys. *Journal of Avian Biology*, 47(5), 642–649. doi:  
389 10.1111/jav.00909
- 390 Cabeza, M., Araújo, M. B., Wilson, R. J., Thomas, C. D., Cowley, M. J. R., & Moilanen, A.  
391 (2004). Combining probabilities of occurrence with spatial reserve design. *Journal of*  
392 *Applied Ecology*, 41(2), 252–262. doi: 10.1111/j.0021-8901.2004.00905.x
- 393 Clare, J., McKinney, S. T., DePue, J. E., & Loftin, C. S. (2017). Pairing field methods to  
394 improve inference in wildlife surveys while accommodating detection covariance.  
395 *Ecological Applications*, 27(7), 2031–2047. doi: 10.1002/eap.1587



- 396 Council Directive 92/43/EEC of 21 May 1992 on the conservation of natural habitats and of  
397 wild fauna and flora. , Pub. L. No. 31992L0043, OJ L 206 (1992).
- 398 Dénes, F. V., Sólymos, P., Lele, S., Silveira, L. F., & Beissinger, S. R. (2017). Biome-scale  
399 signatures of land-use change on raptor abundance: insights from single-visit  
400 detection-based models. *Journal of Applied Ecology*, 54(4), 1268–1278. doi:  
401 10.1111/1365-2664.12818
- 402 Derville, S., Torres, L. G., Iovan, C., & Garrigue, C. (2018). Finding the right fit:  
403 Comparative cetacean distribution models using multiple data sources and statistical  
404 approaches. *Diversity and Distributions*. doi: 10.1111/ddi.12782
- 405 Directive 2008/56/EC of the European Parliament and of the Council of 17 June 2008  
406 establishing a framework for community action in the field of marine environmental  
407 policy (Marine Strategy Framework Directive) (Text with EEA relevance). , Pub. L.  
408 No. 32008L0056, OJ L 164 (2008).
- 409 Dorazio, R. M. (2014). Accounting for imperfect detection and survey bias in statistical  
410 analysis of presence-only data: Imperfect detection and survey bias in presence-only  
411 data. *Global Ecology and Biogeography*, 23(12), 1472–1484. doi: 10.1111/geb.12216
- 412 Fisher, J. T., & Bradbury, S. (2014). A multi-method hierarchical modeling approach to  
413 quantifying bias in occupancy from noninvasive genetic tagging studies: Multi-  
414 Method Models to Quantify NGT Bias. *The Journal of Wildlife Management*, 78(6),  
415 1087–1095. doi: 10.1002/jwmg.750
- 416 Fletcher, R. J., Hefley, T. J., Robertson, E. P., Zuckerberg, B., McCleery, R. A., & Dorazio,  
417 R. M. (2019). A practical guide for combining data to model species distributions.  
418 *Ecology*, e02710. doi: 10.1002/ecy.2710

- 419 Frascchetti, S., Terlizzi, A., Micheli, F., Benedetti-Cecchi, L., & Boero, F. (2002). Marine  
420 Protected Areas in the Mediterranean Sea: Objectives, Effectiveness and Monitoring.  
421 *Marine Ecology*, 23(s1), 190–200. doi: 10.1111/j.1439-0485.2002.tb00018.x
- 422 Gelman, A., Carlin, J. B., Stern, H. S., Dunson, D. B., Vehtari, A., & Rubin, D. B. (2013).  
423 *Bayesian data analysis*. Chapman and Hall/CRC.
- 424 Giakoumi, S., Scianna, C., Plass-Johnson, J., Micheli, F., Grorud-Colvert, K., Thiriet, P., ...  
425 Guidetti, P. (2017). Ecological effects of full and partial protection in the crowded  
426 Mediterranean Sea: a regional meta-analysis. *Scientific Reports*, 7(1). doi:  
427 10.1038/s41598-017-08850-w
- 428 Giannoulaki, M., Iglesias, M., Tugores, M. P., Bonanno, A., Patti, B., Felice, A. D., ...  
429 Valavanis, V. (2013). Characterizing the potential habitat of European anchovy  
430 *Engraulis encrasicolus* in the Mediterranean Sea, at different life stages. *Fisheries*  
431 *Oceanography*, 22(2), 69–89. doi: 10.1111/fog.12005
- 432 Guillera-Aroita, G., Ridout, M. S., & Morgan, B. J. T. (2010). Design of occupancy studies  
433 with imperfect detection: Design of occupancy studies. *Methods in Ecology and*  
434 *Evolution*, 1(2), 131–139. doi: 10.1111/j.2041-210X.2010.00017.x
- 435 Haynes, T. B., Rosenberger, A. E., Lindberg, M. S., Whitman, M., & Schmutz, J. A. (2013).  
436 Method- and species-specific detection probabilities of fish occupancy in Arctic lakes:  
437 implications for design and management. *Canadian Journal of Fisheries and Aquatic*  
438 *Sciences*, 70(7), 1055–1062. doi: 10.1139/cjfas-2012-0527
- 439 Issaris, Y., Katsanevakis, S., Salomidi, M., Tsiamis, K., Katsiaras, N., & Verriopoulos, G.  
440 (2012). Occupancy estimation of marine species: dealing with imperfect detectability.  
441 *Marine Ecology Progress Series*, 453, 95–106. doi: 10.3354/meps09668

- 442 IUCN. (2009). *Tursiops truncatus (Mediterranean subpopulation)*: Bearzi, G., Fortuna, C. &  
443 Reeves, R.: *The IUCN Red List of Threatened Species 2012: e.T16369383A16369386*  
444 [Data set]. doi: 10.2305/IUCN.UK.2012-1.RLTS.T16369383A16369386.en
- 445 IUCN Standards and Petitions Subcommittee. (2014). *Guidelines for the application of IUCN*  
446 *Red List Categories and Criteria, Version 1.0*. Retrieved from  
447 <http://www.iucnredlist.org/documents/RedListGuidelines.pdf>.
- 448 Jiménez, J., García, E. J., Llana, L., Palacios, V., González, L. M., García-Domínguez, F.,  
449 ... López-Bao, J. V. (2016). Multimethod, multistate Bayesian hierarchical modeling  
450 approach for use in regional monitoring of wolves: Occupancy Models and Wolf  
451 Management. *Conservation Biology*, 30(4), 883–893. doi: 10.1111/cobi.12685
- 452 Kendall, W. L., Hines, J. E., Nichols, J. D., & Grant, E. H. C. (2013). Relaxing the closure  
453 assumption in occupancy models: staggered arrival and departure times. *Ecology*,  
454 94(3), 610–617. doi: 10.1890/12-1720.1
- 455 Labach, H., Azzinari, C., Barbier, M., Cesarini, C., Daniel, B., David, L., ... Gimenez, O.  
456 (2019). Distribution and abundance of bottlenose dolphin ( ) over the  
457 French Mediterranean continental shelf. *BioRxiv*. doi: 10.1101/723569
- 458 Laran, S., Authier, M., Van Canneyt, O., Dorémus, G., Watremez, P., & Ridoux, V. (2017). A  
459 Comprehensive Survey of Pelagic Megafauna: Their Distribution, Densities, and  
460 Taxonomic Richness in the Tropical Southwest Indian Ocean. *Frontiers in Marine*  
461 *Science*, 4, 139. doi: 10.3389/fmars.2017.00139
- 462 Laran, S., Pettex, E., Authier, M., Blanck, A., David, L., Dorémus, G., ... Ridoux, V. (2017).  
463 Seasonal distribution and abundance of cetaceans within French waters- Part I: The  
464 North-Western Mediterranean, including the Pelagos sanctuary. *Deep Sea Research*  
465 *Part II: Topical Studies in Oceanography*, 141, 20–30. doi:  
466 10.1016/j.dsr2.2016.12.011

- 467 Lele, S. R., Moreno, M., & Bayne, E. (2012). Dealing with detection error in site occupancy  
468 surveys: what can we do with a single survey? *Journal of Plant Ecology*, 5(1), 22–31.  
469 doi: 10.1093/jpe/rtr042
- 470 Lindenmayer, D. B., & Likens, G. E. (2010). The science and application of ecological  
471 monitoring. *Biological Conservation*, 143(6), 1317–1328. doi:  
472 10.1016/j.biocon.2010.02.013
- 473 Lloret, J., & Riera, V. (2008). Evolution of a Mediterranean Coastal Zone: Human Impacts on  
474 the Marine Environment of Cape Creus. *Environmental Management*, 42(6), 977–988.  
475 doi: 10.1007/s00267-008-9196-1
- 476 Lovett, G. M., Burns, D. A., Driscoll, C. T., Jenkins, J. C., Mitchell, M. J., Rustad, L., ...  
477 Haeuber, R. (2007). Who needs environmental monitoring? *Environmental*  
478 *Monitoring*, 8.
- 479 Lyons, J. E., Runge, M. C., Laskowski, H. P., & Kendall, W. L. (2008). Monitoring in the  
480 Context of Structured Decision-Making and Adaptive Management. *Journal of*  
481 *Wildlife Management*, 72(8), 1683–1692. doi: 10.2193/2008-141
- 482 MacKenzie, D. I. (Ed.). (2006). *Occupancy estimation and modeling: inferring patterns and*  
483 *dynamics of species*. Amsterdam; Boston: Elsevier.
- 484 Mackenzie, D. I., Nichols, J. D., Lachman, G. B., Droege, S., Royle, J. A., & Langtimm, C.  
485 A. (2002). *ESTIMATING SITE OCCUPANCY RATES WHEN DETECTION*  
486 *PROBABILITIES ARE LESS THAN ONE*. 83(8), 8.
- 487 Miller, D. A. W., Pacifici, K., Sanderlin, J. S., & Reich, B. J. (2019). The recent past and  
488 promising future for data integration methods to estimate species' distributions.  
489 *Methods in Ecology and Evolution*, 10(1), 22–37. doi: 10.1111/2041-210X.13110

- 490 Moullec, F., Velez, L., Verley, P., Barrier, N., Ulses, C., Carbonara, P., ... Shin, Y.-J. (2019).  
491 Catching the big picture of the Mediterranean Sea biodiversity with an end-to-end  
492 model of climate and fishing impacts. *BioRxiv*. doi: 10.1101/593822
- 493 Neilson, E. W., Avgar, T., Burton, A. C., Broadley, K., & Boutin, S. (2018). Animal  
494 movement affects interpretation of occupancy models from camera-trap surveys of  
495 unmarked animals. *Ecosphere*, 9(1), e02092. doi: 10.1002/ecs2.2092
- 496 Nichols, J. D., Bailey, L. L., O'Connell Jr., A. F., Talancy, N. W., Campbell Grant, E. H.,  
497 Gilbert, A. T., ... Hines, J. E. (2008). Multi-scale occupancy estimation and modelling  
498 using multiple detection methods. *Journal of Applied Ecology*, 45(5), 1321–1329. doi:  
499 10.1111/j.1365-2664.2008.01509.x
- 500 Nichols, J., & Williams, B. (2006). Monitoring for conservation. *Trends in Ecology &*  
501 *Evolution*, 21(12), 668–673. doi: 10.1016/j.tree.2006.08.007
- 502 Nicol, S., Brazill-Boast, J., Gorrod, E., McSorley, A., Peyrard, N., & Chadès, I. (2019).  
503 Quantifying the impact of uncertainty on threat management for biodiversity. *Nature*  
504 *Communications*, 10(1). doi: 10.1038/s41467-019-11404-5
- 505 Otto, C. R. V., & Roloff, G. J. (2011). Using multiple methods to assess detection  
506 probabilities of forest-floor wildlife. *The Journal of Wildlife Management*, 75(2), 423–  
507 431. doi: 10.1002/jwmg.63
- 508 Passadore, C., Möller, L. M., Diaz-Aguirre, F., & Parra, G. J. (2018). Modelling Dolphin  
509 Distribution to Inform Future Spatial Conservation Decisions in a Marine Protected  
510 Area. *Scientific Reports*, 8(1). doi: 10.1038/s41598-018-34095-2
- 511 Peach, M. A., Cohen, J. B., & Frair, J. L. (2017). Single-visit dynamic occupancy models: an  
512 approach to account for imperfect detection with Atlas data. *Journal of Applied*  
513 *Ecology*, 54(6), 2033–2042. doi: 10.1111/1365-2664.12925

- 514 Pennino, M. G., Mérigot, B., Fonseca, V. P., Monni, V., & Rotta, A. (2017). Habitat  
515 modeling for cetacean management: Spatial distribution in the southern Pelagos  
516 Sanctuary (Mediterranean Sea). *Deep Sea Research Part II: Topical Studies in*  
517 *Oceanography*, *141*, 203–211. doi: 10.1016/j.dsr2.2016.07.006
- 518 Plummer, M., & others. (2003). JAGS: A program for analysis of Bayesian graphical models  
519 using Gibbs sampling. *Proceedings of the 3rd International Workshop on Distributed*  
520 *Statistical Computing*, *124*, 125. Retrieved from  
521 <http://www.ci.tuwien.ac.at/Conferences/DSC-2003/Drafts/Plummer.pdf>
- 522 Pregler, K. C., Vokoun, J. C., Jensen, T., & Hagstrom, N. (2015). Using Multimethod  
523 Occupancy Estimation Models to Quantify Gear Differences in Detection  
524 Probabilities: Is Backpack Electrofishing Missing Occurrences for a Species of  
525 Concern? *Transactions of the American Fisheries Society*, *144*(1), 89–95. doi:  
526 10.1080/00028487.2014.968291
- 527 Queiros, Q., Fromentin, J., Astruc, G., Bauer, R., & Saraux, C. (2018). Dolphin predation  
528 pressure on pelagic and demersal fish in the northwestern Mediterranean Sea. *Marine*  
529 *Ecology Progress Series*, *603*, 13–27. doi: 10.3354/meps12672
- 530 R Core Team, v 3.2.5. (2015). R Core Team (2015). R: A language and environment for  
531 statistical computing. R Foundation for Statistical Computing, Vienna, Austria. URL  
532 <https://www.R-project.org/>. Retrieved May 3, 2016, from <https://www.r-project.org/>
- 533 Read “*Marine Protected Areas: Tools for Sustaining Ocean Ecosystem*” at *NAP.edu*. (2001).  
534 doi: 10.17226/9994
- 535 Royle, J. A., & Kéry, M. (2007). A BAYESIAN STATE-SPACE FORMULATION OF  
536 DYNAMIC OCCUPANCY MODELS. *Ecology*, *88*(7), 1813–1823. doi: 10.1890/06-  
537 0669.1

538 Sea Surface Temperature (1 month - Aqua/MODIS) | NASA [Text.Article]. (2019, August  
539 20). Retrieved August 20, 2019, from Sea Surface Temperature (1 month -  
540 Aqua/MODIS) | NASA website:  
541 <https://neo.sci.gsfc.nasa.gov/view.php?datasetId=MYD28M&year=2012>

542 Sólymos, P., & Lele, S. R. (2016). Revisiting resource selection probability functions and  
543 single-visit methods: clarification and extensions. *Methods in Ecology and Evolution*,  
544 7(2), 196–205. doi: 10.1111/2041-210X.12432

545 Su, Y.-S., & Yajima, M. (2015). R2jags: Using R to Run “JAGS” (Version 0.5-7). Retrieved  
546 from <https://CRAN.R-project.org/package=R2jags>

547 Torres, L. G., Read, A. J., & Halpin, P. (2008). FINE-SCALE HABITAT MODELING OF A  
548 TOP MARINE PREDATOR: DO PREY DATA IMPROVE PREDICTIVE  
549 CAPACITY. *Ecological Applications*, 18(7), 1702–1717. doi: 10.1890/07-1455.1

550 Waggitt, J. J., Evans, P. G. H., Andrade, J., Banks, A. N., Boisseau, O., Bolton, M., ...  
551 Hiddink, J. G. (2019). Distribution maps of cetacean and seabird populations in the  
552 North-East Atlantic. *Journal of Applied Ecology*, 1365-2664.13525. doi:  
553 10.1111/1365-2664.13525

554 Yoccoz, N. G., Nichols, J. D., & Boulinier, T. (2001). Monitoring of biological diversity in  
555 space and time. *Trends in Ecology & Evolution*, 16(8), 446–453. doi: 10.1016/S0169-  
556 5347(01)02205-4

557  
558

559

560

## Tables & Figures

561

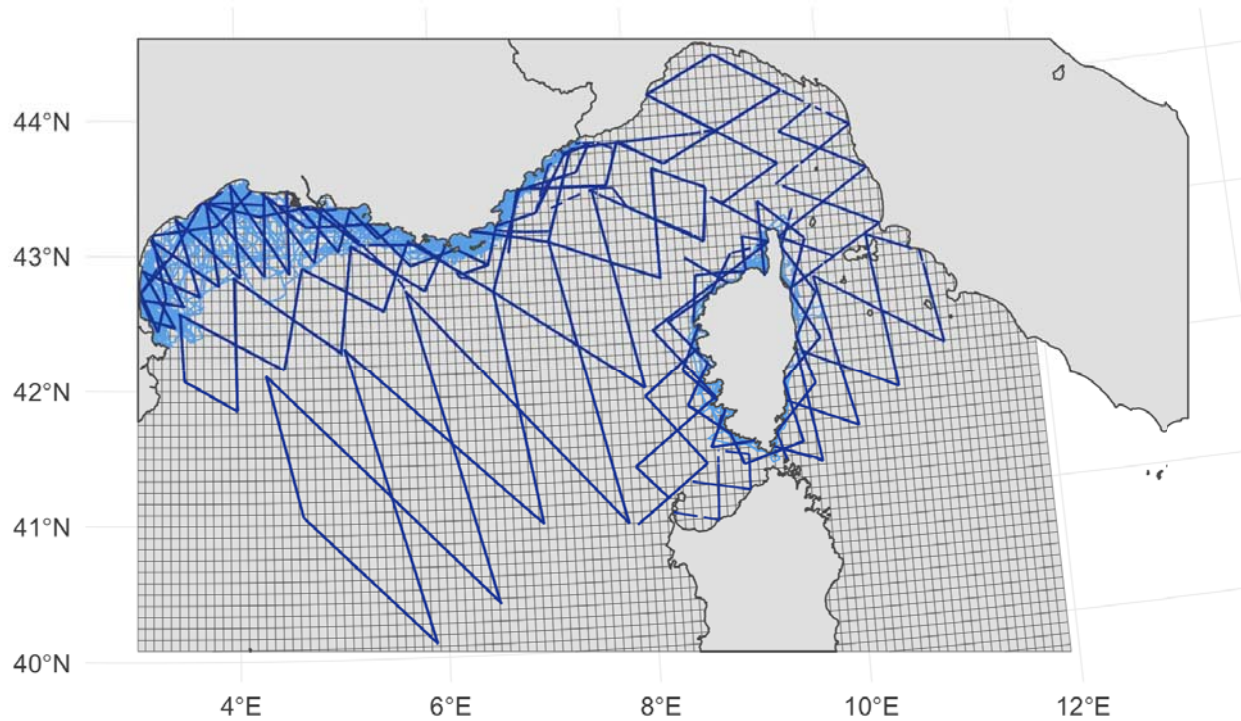

562

563

564 **Figure 1:** Sampling design of the two monitoring programs studied. The aerial surveys  
565 (SMM program; dark blue) prospect 24,624 km of both sea shelf and high seas. At-sea  
566 surveys (GDEGeM program; light blue) prospect 21,646 km of the French continental  
567 shelf.

568

569

570



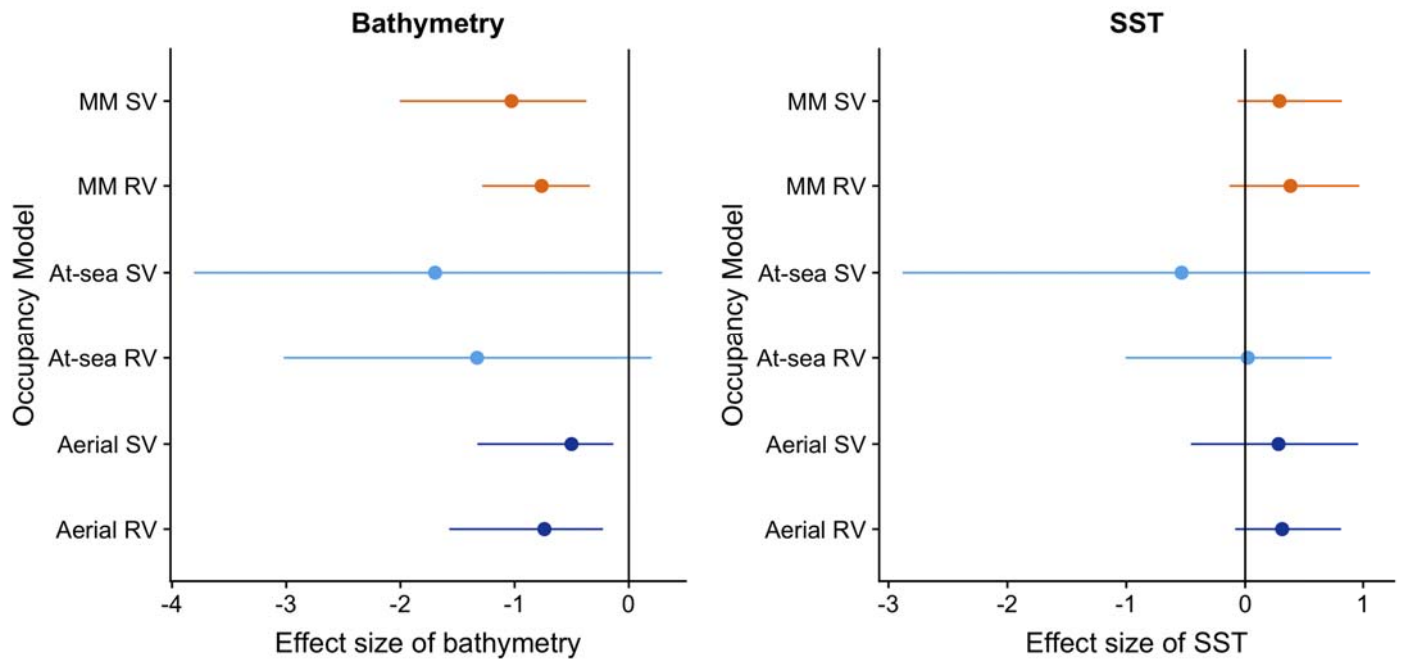

571

572 **Figure 2:** Effect size of bathymetry and sea surface temperature (SST) on the probability  $\Psi$   
573 that a site is used by Bottlenose dolphins (*Tursiops truncatus*) obtained with different  
574 monitoring programs. The posterior mean is provided with the associated 95% credible  
575 interval. “SV” refers to *single-visit* occupancy models, “RV” to *repeated visits* occupancy  
576 models, and “MM” stands for *multi-method* occupancy models, in which aerial surveys and  
577 at-sea surveys are combined. Estimates are given on the logit scale.

578

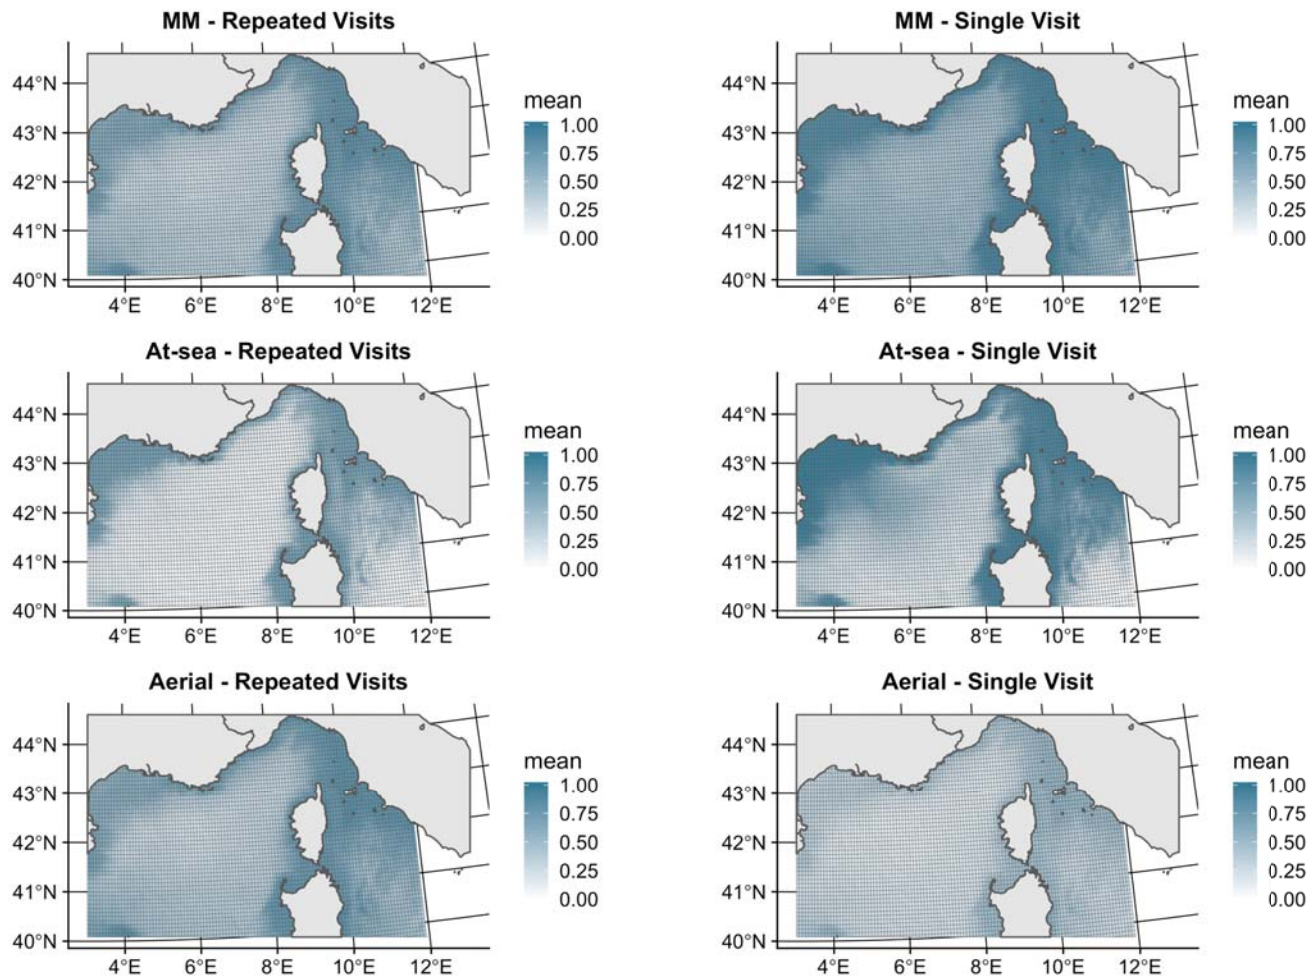

579

580 **Figure 3:** Probability of space use by Bottlenose dolphins (*Tursiops truncatus*) over the NW  
581 Mediterranean Sea. “MM” stands for *multi-method* occupancy models, in which aerial  
582 surveys and at-sea surveys are combined. Repeated-visit occupancy maps refer to occupancy  
583 models with 4 sampling occasions. Single-visit maps refer to occupancy models considering 1  
584 sampling occasion. Using the posterior mean of regression parameters, we estimated the  
585 probability that site *i* was used by bottlenose dolphins.

586

587 **Authors' contribution**

588 VL, MA and OG conceived the ideas and designed methodology; HL and MA collected the  
589 data; VL analysed the data; VL and OG led the writing of the manuscript. All authors  
590 contributed critically to the drafts and gave final approval for publication.

591 **Supporting information**

592 R codes are available on Github.

593 [https://github.com/valentinlauret/SuppInfo\\_Lauret\\_et\\_al](https://github.com/valentinlauret/SuppInfo_Lauret_et_al)

594 Supporting Information is provided under HTML format

595 SuppInfo\_Lauret\_et\_al.html
